# Supplementary material for: Quantum Mechanical Investigation of the Oxidative Cleavage of the C–C Backbone Bonds in Polyethylene Model Molecules
Source: MDPI journal article supplement (doi:10.3390/polym13162730), 2021-08-15
Supplement: s1 [file s1]

# Quantum mechanical investigation of the oxidative cleavage of the C-C backbone bonds in polyethylene in polyethylene model molecules

Qixuan jiang<sup>1</sup>, Zhongyu Li<sup>1</sup>, Ziheng Cui<sup>1</sup>, Ren Wei<sup>2</sup>, Kaili Nie<sup>1</sup>, Haijun Xu<sup>1\*</sup>, Luo Liu<sup>1\*</sup>

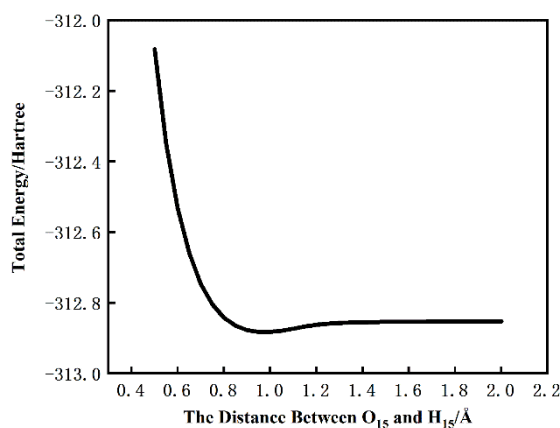

**Figure S1** | Total energy change as a function of the increasing the distance between O<sub>15</sub> and H<sub>15</sub> during a relaxed scan based on the structure shown in **Figure 1A**. The unit used for the y-axis is Hartree with one Ha equal to 2625.50 kJ/mol.

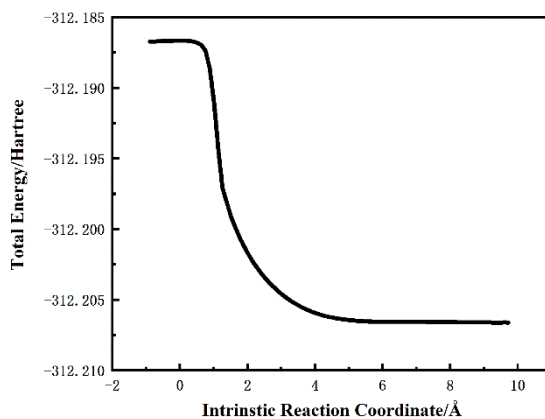

**Figure S2** | IRC analysis potential energy curve.

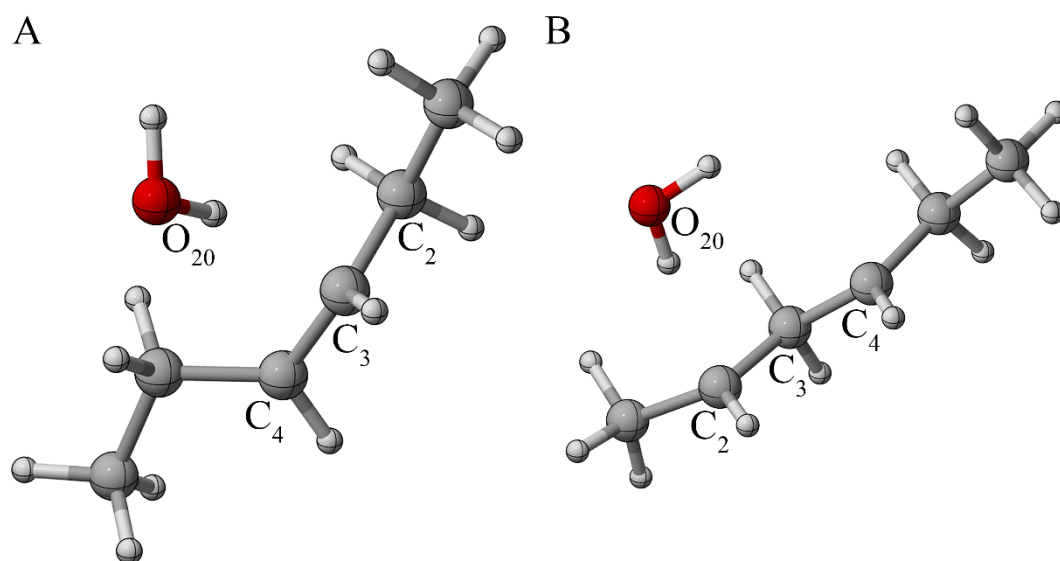

**Figure S3** | (A) alkane free radical with ortho-carbon atoms each containing an unpaired electron; (B) alkane radical with meta-carbon atoms each containing an unpaired electron

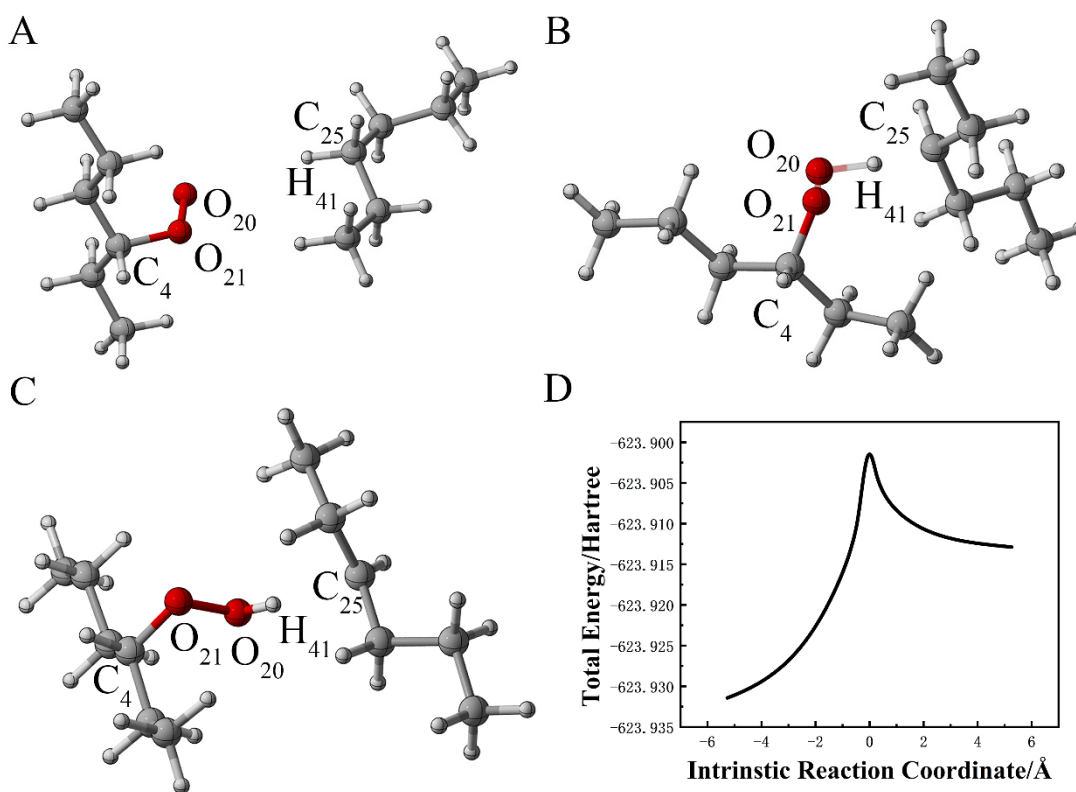

**Figure S4** | (A) The structure of the reactant; (B) The structure of the transition state structure; (C) The structure of the product structure; (D) IRC analysis potential energy curve.

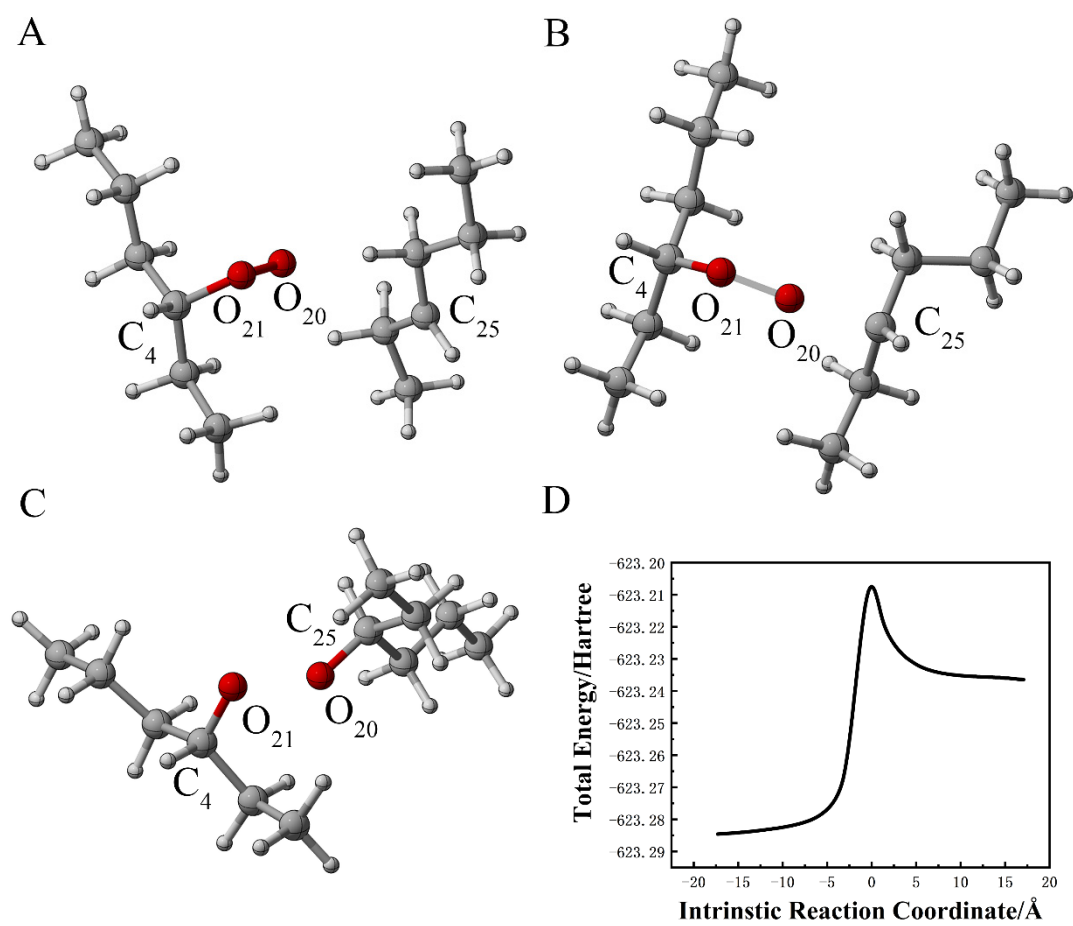

**Figure S5** | (A) The structure of the reactant; (B) The structure of the transition state structure; (C) The structure of the product structure; (D) IRC analysis potential energy curve.

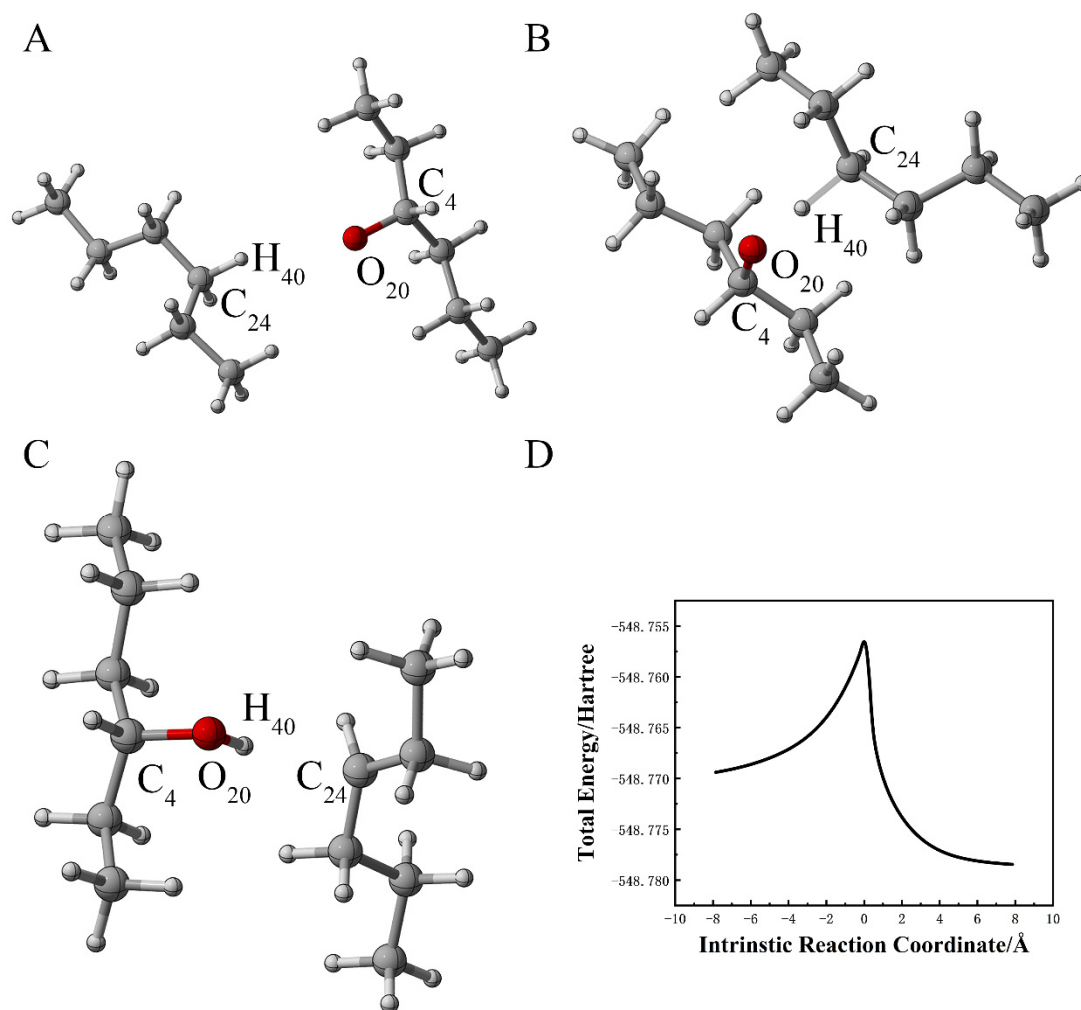

**Figure S6** | (A) The structure of the reactant; (B) The structure of the transition state structure; (C) The structure of the product structure; (D) IRC analysis potential energy curve.

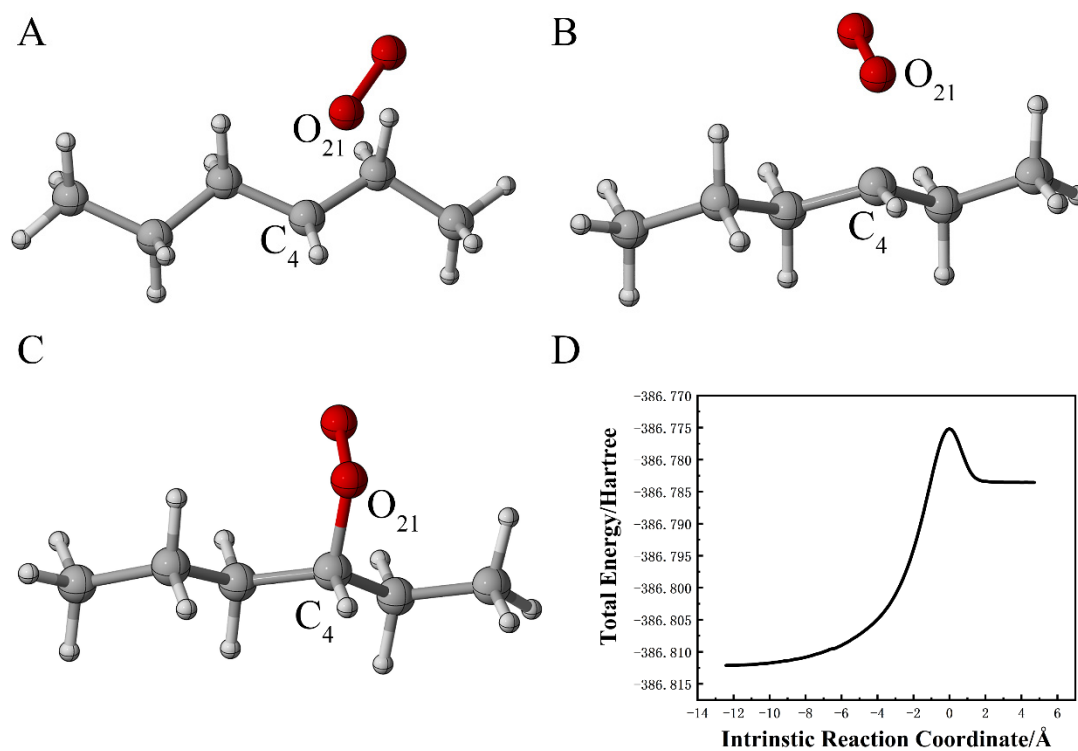

**Figure S7** | (A) The structure of the reactant; (B) The structure of the transition state structure; (C) The structure of the product structure; (D) IRC analysis potential energy curve.
